# Supplementary material
Source: ML conference proceedings conference paper supplement (https://openreview.net/forum?id=5KF3Q79t8B)
Supplement: supplementary_material [file attachment]

Dear Reviewers and other Public Viewers,

The source code of our paper is available at the following anonymous repository:

[https://anonymous.4open.science/r/iclr2024\\_submission4258-D1C7/](https://anonymous.4open.science/r/iclr2024_submission4258-D1C7/)

Best Regards,

Submission4258 Authors
